# Supplementary material for: Hydrate catalysts enabled the self-reconstruction of NiMoO4 for efficient water oxidation
Source: Royal Society of Chemistry journal article supplement (doi:10.1039/d4tc00885e), 2024-01-01
Supplement: d4tc00885e1.pdf [file d4tc00885e1.pdf]

# Supporting information

## Hydrate enabled the self-reconstruction of NiMoO<sub>4</sub> for efficient water oxidation

Jianmin Wang,<sup>b,†</sup> Hongyu Zhao,<sup>b,†</sup> Hao Zhang<sup>b</sup>, Haitao Huang,<sup>a,c</sup> Ruoyu Huang<sup>b</sup>, Haijin Li,<sup>a,b,\*</sup>  
Yongtao Li,<sup>a,c,\*</sup> Xiaofang Liu,<sup>b,\*</sup> Xiaolong Deng<sup>a,d</sup>

<sup>a</sup> Low-Carbon New Materials Research Center, Low-Carbon Research Institute, Anhui University of Technology,  
Ma'anshan, 243002, P. R. China

<sup>b</sup> School of Energy and Environment, Anhui University of Technology, Ma'anshan, 243002, P. R. China

<sup>c</sup> School of Materials Science and Engineering, Anhui University of Technology, Ma'anshan, 243002, P. R. China

<sup>d</sup> School of Microelectronics and Data Science, Anhui University of Technology, Ma'anshan, 243002, P. R. China

† Wang and Zhao equally contribute to the work.

\* Corresponding Authors: Haijin Li, [lihaijin@ahut.edu.cn](mailto:lihaijin@ahut.edu.cn); Yongtao Li, [liyongtao@ahut.edu.cn](mailto:liyongtao@ahut.edu.cn); Xiaofang Liu, [xfliu2003@163.com](mailto:xfliu2003@163.com).

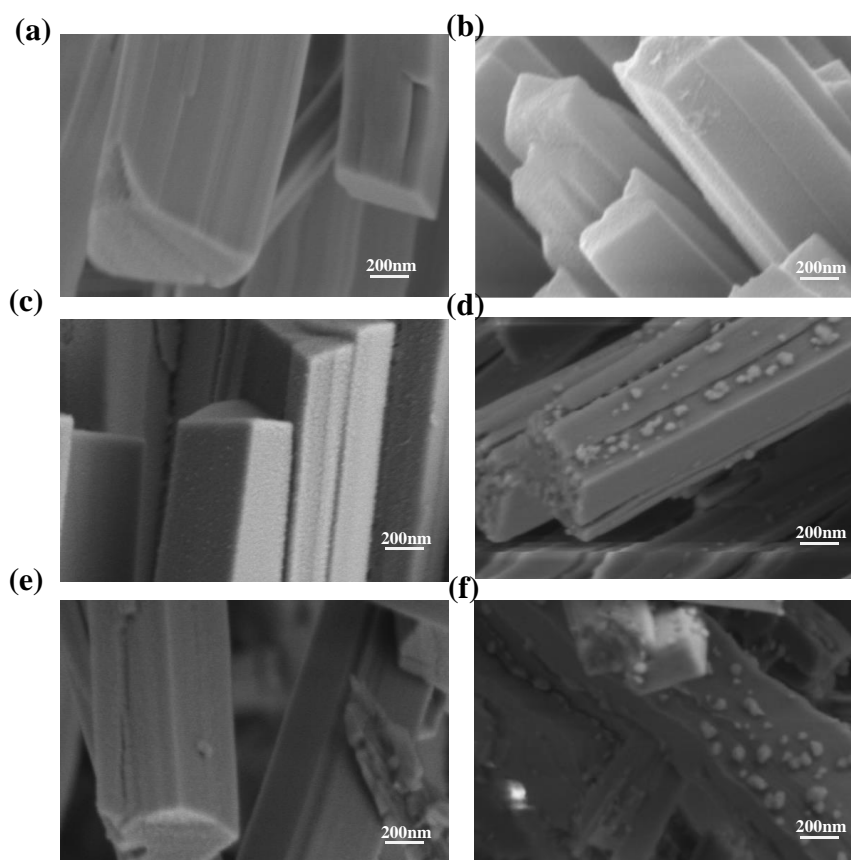

Figure S1 SEM images of (a, b) NiMoO<sub>4</sub>-350; (c, d) NiMoO<sub>4</sub>-550; (e, f) NiMoO<sub>4</sub>-650 before and after CV etching.

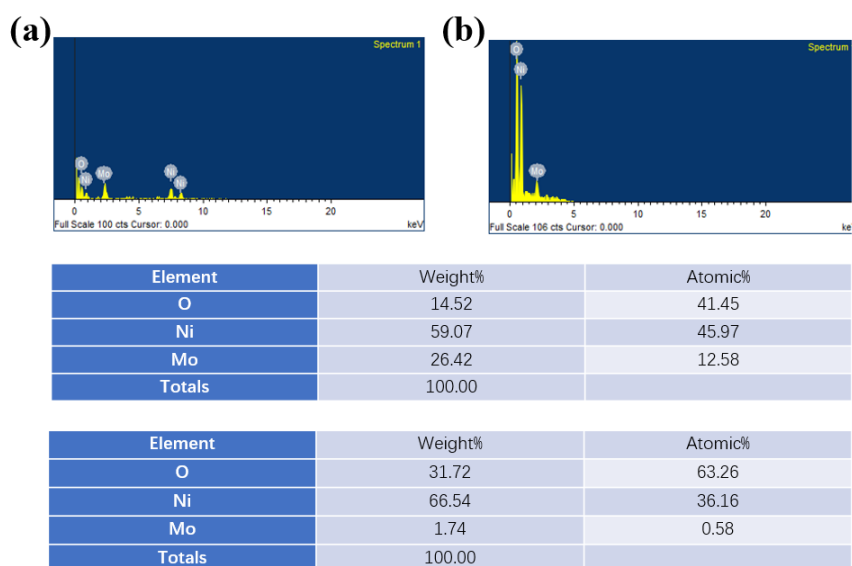

Figure S2 EDS spectrum of NiMoO<sub>4</sub>•xH<sub>2</sub>O (a) before CV; (b) after CV.

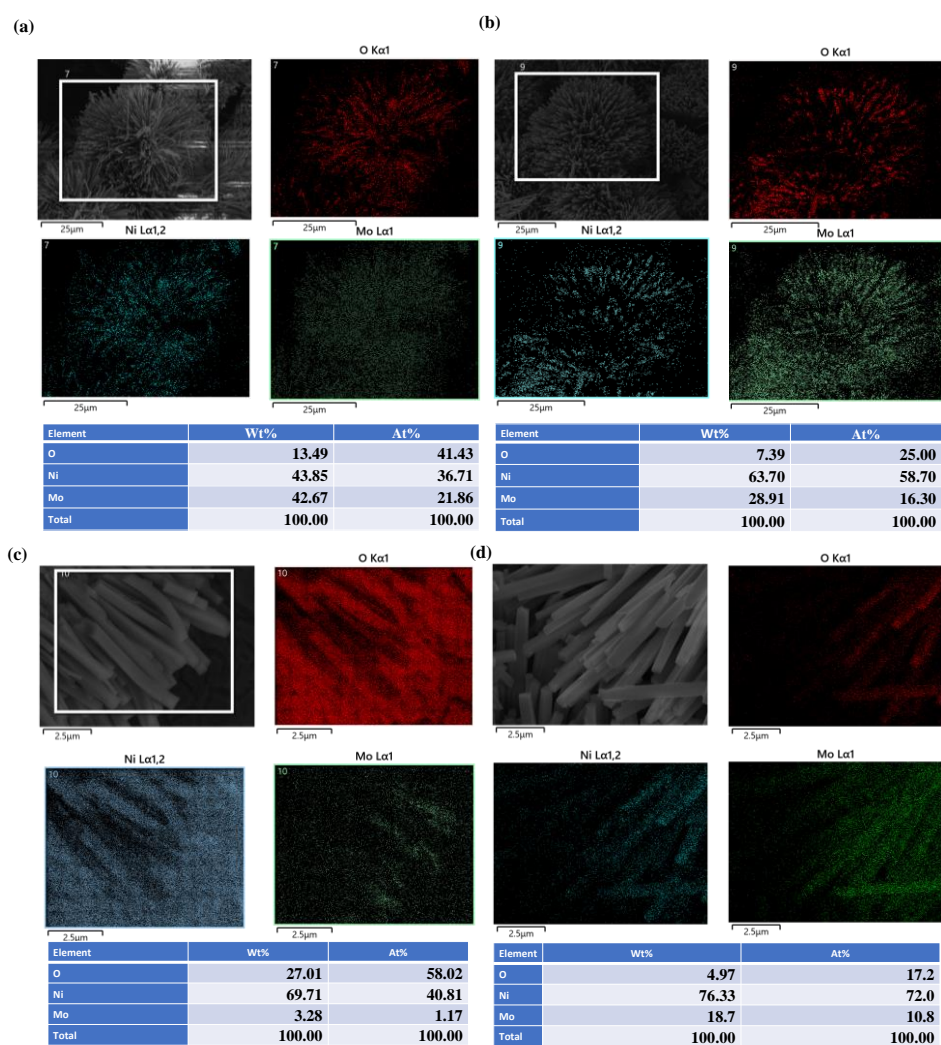

Figure S3 EDS spectrum of (a, b) NiMoO<sub>4</sub>-550 before CV and after CV. (c, d) NiMoO<sub>4</sub>•xH<sub>2</sub>O and NiMoO<sub>4</sub>-550 after long-time duration test at a current density of 100 mA cm<sup>-2</sup>.

**NiMoO<sub>4</sub>-350**

| Element | Wt%    | At%    |
|---------|--------|--------|
| O       | 24.13  | 60.63  |
| Ni      | 28.48  | 19.50  |
| Mo      | 47.40  | 19.86  |
| Total   | 100.00 | 100.00 |

**NiMoO<sub>4</sub>-350-CV**

| Element | Wt%    | At%    |
|---------|--------|--------|
| O       | 20.69  | 50.19  |
| Ni      | 69.07  | 45.66  |
| Mo      | 10.24  | 4.14   |
| Total   | 100.00 | 100.00 |

**NiMoO<sub>4</sub>-650**

| Element | Wt%    | At%    |
|---------|--------|--------|
| O       | 14.69  | 43.81  |
| Ni      | 43.70  | 35.51  |
| Mo      | 41.61  | 20.69  |
| Total   | 100.00 | 100.00 |

**NiMoO<sub>4</sub>-650-CV**

| Element | Wt%    | At%    |
|---------|--------|--------|
| O       | 22.49  | 58.06  |
| Ni      | 31.43  | 22.11  |
| Mo      | 46.08  | 19.83  |
| Total   | 100.00 | 100.00 |

Figure S4 EDS spectrum of NiMoO<sub>4</sub>-350 and NiMoO<sub>4</sub>-650 before CV and after CV.

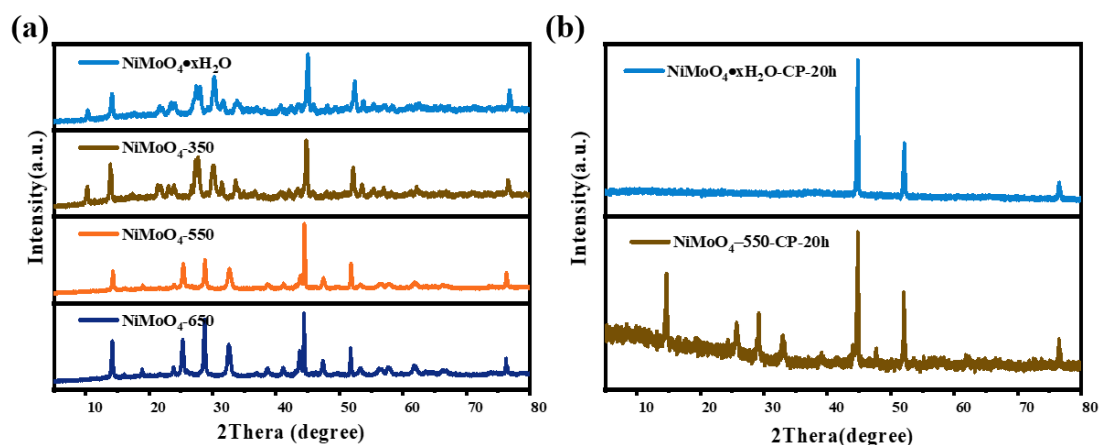

Figure S5 XRD patterns of (a) NiMoO<sub>4</sub>·xH<sub>2</sub>O, NiMoO<sub>4</sub>-350, NiMoO<sub>4</sub>-550 and NiMoO<sub>4</sub>-650; (b) NiMoO<sub>4</sub>·xH<sub>2</sub>O-CP and NiMoO<sub>4</sub>-550-CP.

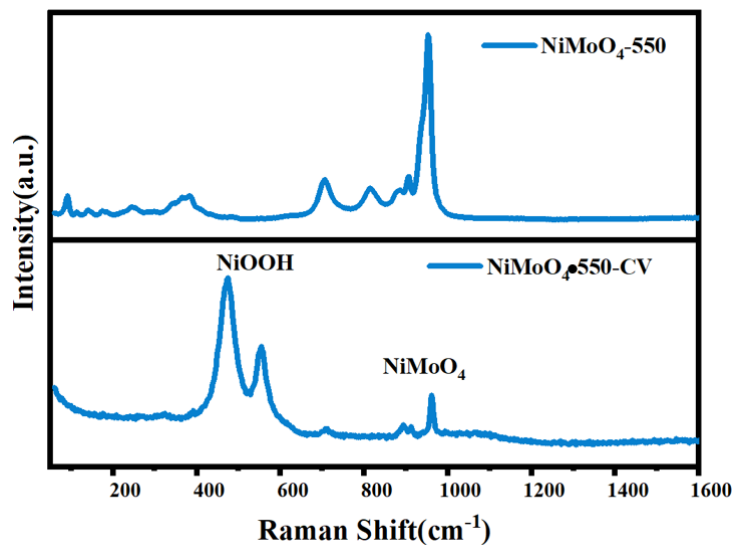

Figure S6 Raman spectrum of NiMoO<sub>4</sub>-550

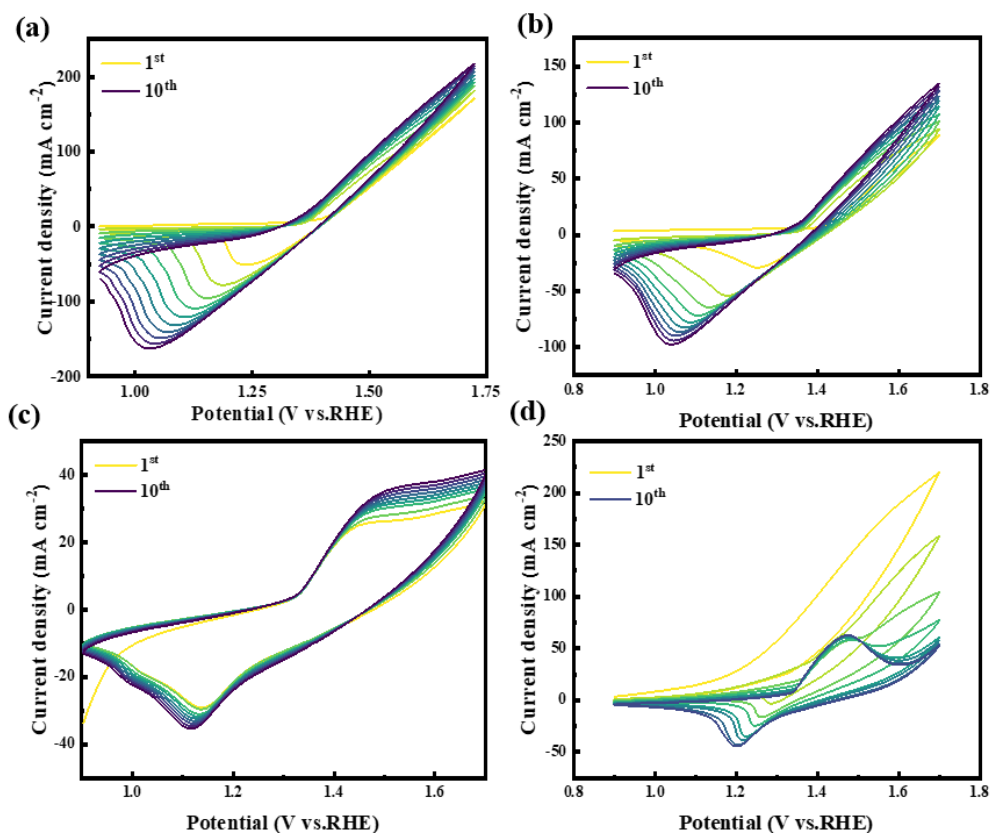

Figure S7 Evolutive CV curves of (a) NiMoO<sub>4</sub>·x H<sub>2</sub>O, (b) NiMoO<sub>4</sub>-550, (c) NiMoO<sub>4</sub>-350, (d) NiMoO<sub>4</sub>-650.

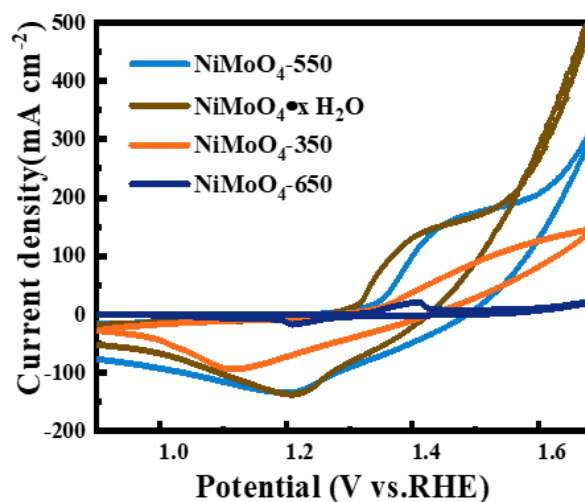

Figure S8 LSV curves of samples after different heat treatments.

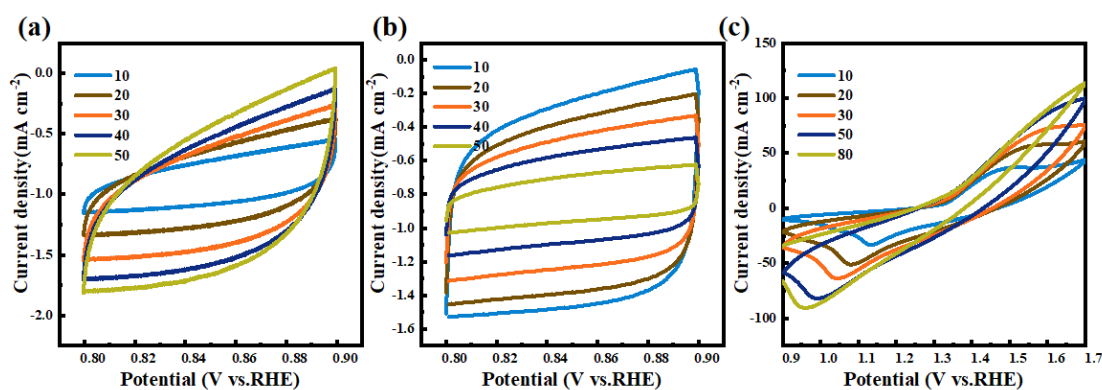

Figure S9 CV curves of NiMoO<sub>4</sub>•xH<sub>2</sub>O-CV (a) and NiMoO<sub>4</sub>-550-CV (b) at the potential of 0.8-0.9 V vs. RHE (for  $C_{dl}$  in Figure 3e); (c) CV curves of NiMoO<sub>4</sub>-550-CV at the potential of 0.9-1.7 V vs. RHE (for the surface coverage of electroactive species ( $\Gamma^*$ ) in Figure 4f).

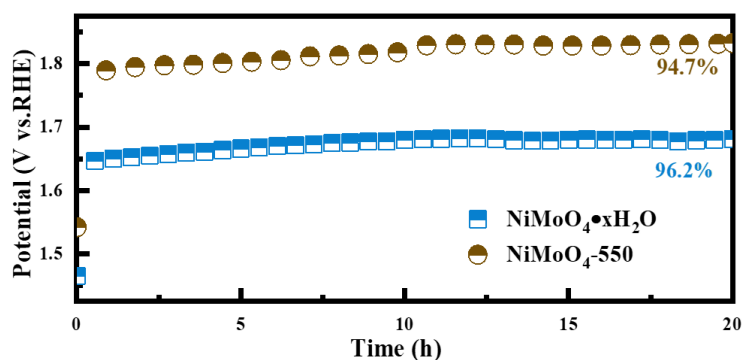

Figure S10 Long-time duration test of (a) NiMoO<sub>4</sub>•xH<sub>2</sub>O and (b) NiMoO<sub>4</sub>-550 at a current density of 100 mA cm<sup>-2</sup>

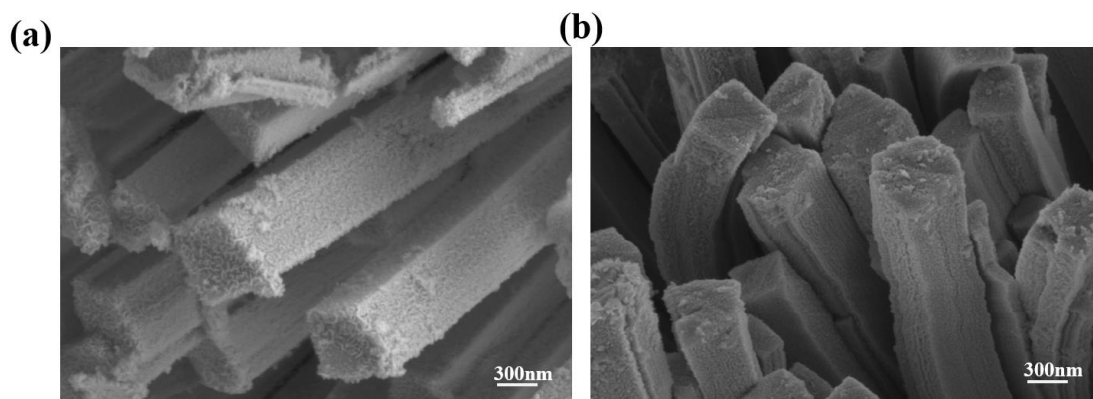

Figure S11 SEM images of (a)  $\text{NiMoO}_4 \cdot x\text{H}_2\text{O}$  and (b)  $\text{NiMoO}_4\text{-550}$  after long-time duration test at a current density of  $100 \text{ mA cm}^{-2}$ .

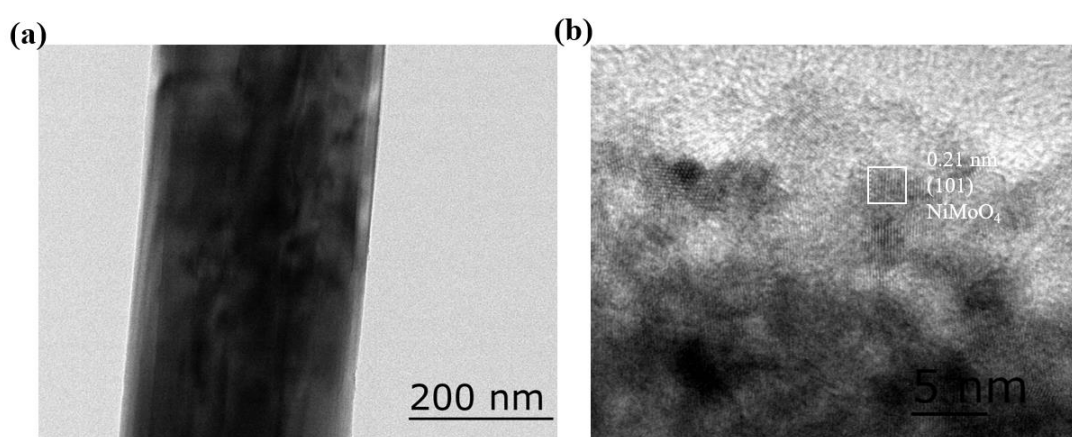

Figure S12 (a, b) TEM images of  $\text{NiMoO}_4 \cdot x\text{H}_2\text{O}$ .

Table S13 The overpotential and Tafel slope in different references

|                                                    | Overpotential/mV | Tafel/mV $\text{dec}^{-1}$ |      |
|----------------------------------------------------|------------------|----------------------------|------|
| N-NiMoO <sub>4</sub> /Ni/CNTs                      | 330              | 89.5                       | [1]  |
| NiMoO <sub>4</sub> @Co <sub>3</sub> O <sub>4</sub> | 120              | 58                         | [2]  |
| NiMoO <sub>4</sub> -NRs@RGO                        | 185              | 54                         | [3]  |
| NiMoO <sub>4</sub> nanorods                        | 340              | 45.6                       | [4]  |
| NiMoO <sub>4-x</sub> /MoO <sub>2</sub>             | 233              | 69                         | [5]  |
| Fe-CQDs/NiMoO <sub>4</sub> /NF                     | 336              | 71.8                       | [6]  |
| FeOOH-decorated NiMoO <sub>4</sub>                 | 208              | 60.1                       | [7]  |
| NiMoO <sub>4</sub>                                 | 239              | 71.8                       | [8]  |
| NMO-30M                                            | 260              | 85.7                       | [9]  |
| G@MoNi <sub>4</sub> -NiMoO <sub>4</sub> /NF        | 206              | 42                         | [10] |
| N-NiMoO <sub>4</sub> /NiO <sub>2</sub>             | 185.6            | 91.4                       | [11] |
| Fe-NiMoO <sub>4</sub> -clusters/NF                 | 170              | 54.6                       | [12] |
| NiMoO <sub>4</sub> -ZIF                            | 235              | 68.8                       | [13] |

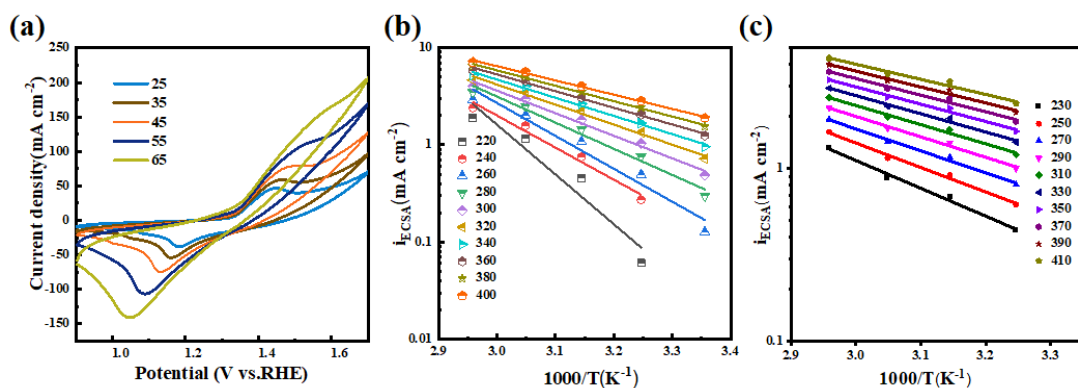

Figure S14 (a) CV curves at different temperatures of NiMoO<sub>4</sub>-550-CV; The logarithm of the catalytic current density plotted against 1000 times the reciprocal of the temperature (in Kelvin) to extract the apparent activation energy ( $E_{app}$ ) and the pre-exponential factor ( $A_{app}$ ) of the OER on (b) NiMoO<sub>4</sub>· $x$ H<sub>2</sub>O-CV and (c) NiMoO<sub>4</sub>-550 catalysts at fixed overpotentials using the Arrhenius plots. The extracted  $E_{app}$  values and the pre-exponential factors ( $A_{app}$ ) are shown in Figure 5d, respectively.

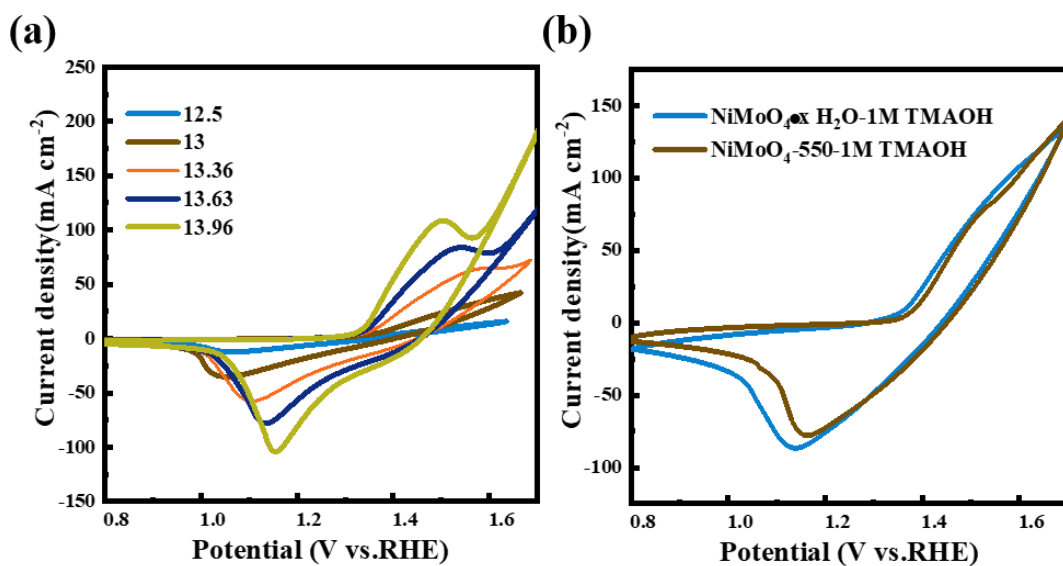

Figure S15 (a) CV curves NiMoO<sub>4</sub>-550-CV under different pHs; (b) CV curves of NiMoO<sub>4</sub>· $x$ H<sub>2</sub>O-CV and NiMoO<sub>4</sub>-550-CV in 1M TMAOH.

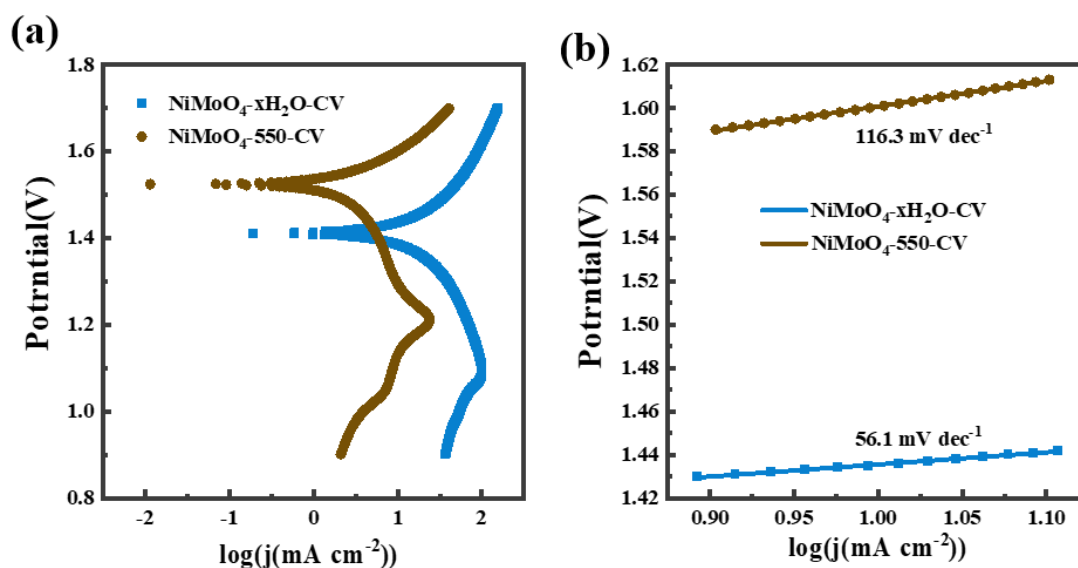

Figure S16 Tafel slope of NiMoO<sub>4</sub>-550-CV and NiMoO<sub>4</sub>-xH<sub>2</sub>O-CV without iR compensation for the OER determined with steady-state measurements.

## Supplementary references

1. L. An, J. Feng, Y. Zhang, R. Wang, H. Liu, G. Wang, F. Cheng and P. Xi, Epitaxial Heterogeneous Interfaces on N-NiMoO<sub>4</sub>/NiS<sub>2</sub> Nanowires/Nanosheets to Boost Hydrogen and Oxygen Production for Overall Water Splitting, *Adv. Funct. Mater.*, 2019, 29, 1, DOI: 10.1002/adfm.201805298.
2. G. Solomon, A. Landström, R. Mazzaro, M. Jugovac, P. Moras, E. Cattaruzza, V. Morandi, I. Concina and A. Vomiero, NiMoO<sub>4</sub>@Co<sub>3</sub>O<sub>4</sub> Core–Shell Nanorods: In Situ Catalyst Reconstruction toward High Efficiency Oxygen Evolution Reaction, *Adv. Energy Mater.*, 2021, 11, 32, DOI: 10.1002/aenm.202101324.
3. G. Li, X. Qiao, Y. Miao, T. Wang and F. Deng, Synergistic Effect of N-NiMoO<sub>4</sub>/Ni Heterogeneous Interface with Oxygen Vacancies in N-NiMoO<sub>4</sub>/Ni/CNTs for Superior Overall Water Splitting, *Small*, 2023, 19, 28, DOI: 10.1002/sml.202207196.
4. V. M. Jiménez, A. Fernández, J. P. Espinós and A. R. González-Elipé, The state of the oxygen at the surface of polycrystalline cobalt oxide, *J. Electron Spectrosc. Relat. Phenom.*, 1995, 71, 61–71, DOI: 10.1016/0368-2048(94)02238-0.
5. X. Zhao, J. Meng, Z. Yan, F. Cheng and J. Chen, Nanostructured NiMoO<sub>4</sub> as active electrocatalyst for oxygen evolution, *Chin. Chem. Lett.*, 2019, 30, 2, 319–323, DOI: 10.1016/j.ccllet.2018.03.035.
6. J. Ahmed, M. Alam, M. A. Majeed Khan and S. M. Alshehri, Bifunctional electro-catalytic performances of NiMoO<sub>4</sub>-NRs@RGO nanocomposites for oxygen evolution and oxygen reduction reactions, *J. King Saud Univ., Sci.*, 2021, 33, 2, 101317, DOI: 10.1016/j.jksus.2020.101317.
7. Z. Wang, H. Wang, S. Ji, X. Wang, P. Zhou, S. Huo, V. Linkov and R. Wang, A High Faraday Efficiency NiMoO<sub>4</sub> Nanosheet Array Catalyst by Adjusting the Hydrophilicity for Overall Water Splitting, *Chem. – Eur. J.*, 2020, 26, 52, 12067–12074, DOI: 10.1002/chem.202002310.
40. H. Hao, Y. Li, Y. Wu, Z. Wang, M. Yuan, J. Miao, Z. Lv, L. Xu and B. Wei, In-situ probing the



rapid reconstruction of FeOOH-decorated NiMoO<sub>4</sub> nanowires with boosted oxygen evolution activity, *Mater. Today Energy*, 2022, 23, 100887, DOI: 10.1016/j.mtener.2021.100887.

8. Y. Song, W. Sha, M. Song, P. Liu, J. Tian, H. Wei, X. Hao, B. Xu, J. Guo and J. Liang, Defect engineered ultrathin NiMoO<sub>4</sub> nanomeshes as efficient and stable electrocatalysts for overall water splitting, *Ceram. Int.*, 2021, 47, 13, 19098–19105, DOI: 10.1016/j.ceramint.2021.03.256.

9. J. Zhu, J. Qian, X. Peng, B. Xia and D. Gao, Etching-Induced Surface Reconstruction of NiMoO<sub>4</sub> for Oxygen Evolution Reaction, *Nano-Micro Lett.*, 2023, 15, 1, 30, DOI: 10.1007/s40820-022 01011-3.

10. L. An, X. Zang, L. Ma, J. Guo, Q. Liu and X. Zhang, Graphene layer encapsulated MoNi<sub>4</sub>-NiMoO<sub>4</sub> for electrocatalytic water splitting, *Appl. Surf. Sci.*, 2020, 504, 144390, DOI: 10.1016/j.apsusc.2019.144390.

11. Z. Hou, F. Fan, Z. Wang and Y. Du, A stable N-doped NiMoO<sub>4</sub>/NiO<sub>2</sub> electrocatalyst for efficient oxygen evolution reaction, *Dalton Trans.*, 2024, 53, 7430–7435, DOI: 10.1039/D3DT04034H.

12. Q. Yue, R. Guo, R. Wang, G. Zhang, Y. Huang, L. Guan, W. Zhang and T. Wuren, In situ preparation of Fe-doped NiMoO<sub>4</sub> nanoflower clusters as efficient electrocatalysts for oxygen evolution reaction and overall water splitting, *Electrochim. Acta*, 2024, 484, 144071, DOI: 10.1016/j.electacta.2024.144071

13. M. Song, X. Lu, M. Du, Z. Chen, C. Zhu, H. Xu, W. Cheng, W. Zhuang, Z. Li, and L. Tian, Electronic and architecture engineering of hammer-shaped Ir-NiMoO<sub>4</sub>-ZIF for effective oxygen evolution. *CrystEngComm*, 2022, 24, 5995–6000, DOI: 10.1039/D2CE00924B.
